# Supplementary material for: Plant Growth, Yield, and Quality of Containerized Heirloom Chile Pepper Cultivars Affected by Three Types of Biostimulants
Source: MDPI journal article supplement (doi:10.3390/horticulturae9010012), 2022-12-21
Supplement: s1 [file s1]

**Table S1.** Fruit diameter of chile peppers affected by the interaction between cultivar and biostimulant treatment in 2020 and 2021.

| Cultivar            | Biostimulant          | Fruit diameter (mm) |          |           |          |          |           |
|---------------------|-----------------------|---------------------|----------|-----------|----------|----------|-----------|
|                     |                       | 2020                |          |           | 2021     |          |           |
|                     |                       | July <sup>1,2</sup> | August   | September | July     | August   | September |
| Anaheim<br>Chili    | Tribus                | 33.8 c              | 29.2 de  | 24.4 h-j  | 28.0 g   | 29.0 gh  | 27.5 gh   |
|                     | Vitazyme              | 32.6 c              | 30.7 c-e | 26.8 f-h  | 27.8 g   | 28.5 h   | 26.6 hi   |
|                     | C-BIO CPS             | 32.8 c              | 28.7 e   | 27.2 e-h  | 28.6 g   | 29.9 f-h | 27.9 gh   |
|                     | Control               | 34.9 c              | 30.6 cde | 25.5 g-i  | 30.0 fg  | 30.2 e-h | 29.4 e-h  |
| Ancho or<br>Poblano | Tribus                | 46.9 ab             | 39.9 b   | 40.1 bc   | 45.5 c   | 46.7 bc  | 40.6 bc   |
|                     | Vitazyme              | 47.0 ab             | 43.0 ab  | 37.7 c    | 46.9 bc  | 47.5 bc  | 41.3 bc   |
|                     | C-BIO CPS             | 44.0 b              | 42.2 ab  | 38.0 c    | 45.4 c   | 46.7 bc  | 43.0 bc   |
|                     | Control               | 46.6 ab             | 45.0 a   | 38.1c     | 43.6 c   | 45.5 c   | 40.1 c    |
| Big Jim             | Tribus                | 35.1 c              | 31.1 c-e | 28.9 e-g  | 30.5 fg  | 32.3 d-g | 30.4 d-g  |
|                     | Vitazyme              | 35.1 c              | 32.4 cd  | 33.1 d    | 31.4 fg  | 31.0 d-h | 28.3 f-h  |
|                     | C-BIO CPS             | 35.9 c              | 32.2 cd  | 28.9 e-g  | 31.1 fg  | 32.9 d-f | 31.4 d-f  |
|                     | Control               | 35.4 c              | 32.4 cd  | 28.4 e-g  | 33.3 ef  | 32.2 d-g | 30.9 d-g  |
| Cayenne<br>Purple   | Tribus                | 14.4 f              | 14.0 g   | 14.5 no   | 14.9 k   | 13.5 lm  | 12.6 no   |
|                     | Vitazyme              | 12.9 f-h            | 12.4 gh  | 13.2 o    | 16.5 jk  | 15.1 l   | 15.3 l-n  |
|                     | C-BIO CPS             | 15.5 ef             | 13.5 g   | 14.0 o    | 16.3 jk  | 14.6 l   | 14.4 l-n  |
|                     | Control               | 13.2 fg             | 12.5 gh  | 12.8 o    | 15.2 k   | 13.8 l   | 13.7 mn   |
| Chile de<br>Arbol   | Tribus                | 8.7 h               | 9.2 h    | 8.3 p     | 9.1 l    | 10.1 mn  | 9.2 po    |
|                     | Vitazyme              | 8.9 gh              | 9.4 h    | 8.3 p     | 9.0 l    | 8.6 n    | 9.2 po    |
|                     | C-BIO CPS             | 9.5 gh              | 9.6 h    | 9.0 p     | 9.1 l    | 8.9 n    | 9.3 po    |
|                     | Control               | 8.9 gh              | 9.5 h    | 8.6 p     | 8.8 l    | 9.3 n    | 8.9 p     |
| Jamaica<br>Hot Red  | Tribus                | 45.1 ab             | 44.7 a   | 44.2 a    | 47.5 a-c | 52.1 a   | 46.8 a    |
|                     | Vitazyme              | 49.8 a              | 45.3 a   | 43.9 ab   | 51.5 a   | 49.6 ab  | 43.5 a-c  |
|                     | C-BIO CPS             | 44.2 b              | 43.1 ab  | 43.0 ab   | 49.9 ab  | 46.7 bc  | 43.7 ab   |
|                     | Control               | 45.8 ab             | 42.2 ab  | 45.6 a    | 46.3 bc  | 47.4 bc  | 43.9 ab   |
| Mulato<br>Isleno    | Tribus                | 23.3 d              | 21.0 f   | 22.6 i-k  | 21.2 hi  | 20.9 i-k | 20.4 jk   |
|                     | Vitazyme              | 22.8 d              | 19.8 f   | 22.5 i-l  | 21.1 hi  | 21.9 i-k | 22.2 j    |
|                     | C-BIO CPS             | 22.5 d              | 19.8 f   | 20.5 k-m  | 22.7 h   | 24.1 i   | 23.6 ij   |
|                     | Control               | 22.4 d              | 20.0 f   | 20.7 j-m  | 22.1 hi  | 22.6 ij  | 22.6 j    |
| Padron              | Tribus                | 34.7 c              | 31.7 c-e | 29.3 d-f  | 32.7 ef  | 33.5 de  | 32.7 de   |
|                     | Vitazyme              | 35.5 c              | 32.5 cd  | 31.1 de   | 35.8 de  | 32.8 d-f | 32.2 de   |
|                     | C-BIO CPS             | 34.9 c              | 33.3 c   | 30.2 d-f  | 38.1 d   | 32.6 d-g | 32.9 d    |
|                     | Control               | 34.0 c              | 31.9 c-e | 28.4 e-g  | 36.2 de  | 34.4 d   | 32.9 d    |
| Pasilla<br>Bajio    | Tribus                | 21.1 d              | 19.5 f   | 19.9 k-m  | 18.6 i-k | 19.2 jk  | 17.8 kl   |
|                     | Vitazyme              | 21.1 d              | 20.0 f   | 17.8 mn   | 19.8 h-j | 18.8 k   | 17.2 k-m  |
|                     | C-BIO CPS             | 21.0 d              | 20.2 f   | 18.9 lm   | 19.5 h-j | 18.8 k   | 17.2 kl   |
|                     | Control               | 19.8 de             | 19.0 f   | 18.2 mn   | 18.4 i-k | 19.2 jk  | 17.6 kl   |
| P-value             | Cultivar              | <.0001              | <.0001   | <.0001    | <.0001   | <.0001   | <.0001    |
|                     | Biostimulant          | 0.49                | 0.40     | 0.053     | 0.0006   | 0.66     | 0.041     |
|                     | Cultivar*Biostimulant | 0.032               | 0.0008   | <.0001    | 0.0001   | <.0001   | <.0001    |

<sup>1</sup> Different lower-case letters suggest significant difference among means within a column indicated by Tukey's HSD test at  $P \leq 0.05$ . <sup>2</sup> Highlighted areas indicate variations of tested variable among biostimulant treatments within a given cultivar.

**Table S2.** Fruit color of chile peppers affected by the interaction between cultivar and biostimulant treatment in 2020.

| Cultivar            | Biostimulant          | L <sup>1,2</sup> | 2020      |          |          |           |          |          |           |          |
|---------------------|-----------------------|------------------|-----------|----------|----------|-----------|----------|----------|-----------|----------|
|                     |                       |                  | July      |          |          | August    |          |          | September |          |
|                     |                       |                  | a*        | b*       | L        | a*        | b*       | L        | a*        | b*       |
| Anaheim<br>Chili    | Tribus                | 39.7 f-h         | -15.5 h-k | 25.4 gh  | 42.1 fg  | -15.7 h-k | 29.4 f-j | 40.5 gh  | -13.2 f-i | 24.7 g-j |
|                     | Vitazyme              | 40.1 f-h         | -14.9 h-k | 24.9 h   | 42.4 e-g | -15.0 h-k | 28.7 g-j | 40.8 gh  | -11.4 f-i | 24.2 g-j |
|                     | C-BIO CPS             | 38.8 f-h         | -14.9 h-k | 25.0 gh  | 41.3 fg  | -12.7 g-k | 26.7 j   | 41.6 f-g | -13.5 f-i | 26.1 f-i |
|                     | Control               | 38.0 gh          | -14.6 h-k | 23.3 h   | 41.1 fg  | -13.7 h-k | 27.3 ij  | 40.2 gh  | -9.5 e-i  | 25.0 g-j |
| Ancho or<br>Poblano | Tribus                | 29.6 i-l         | -8.3 c-e  | 10.3 i-k | 32.2 h-j | -8.9 f-k  | 14.1 kl  | 30.2 k-o | 6.8 c-e   | 12.5 m-o |
|                     | Vitazyme              | 30.6 i-k         | -9.5 e-g  | 12.0 ij  | 33.1 h   | -11.1 g-k | 15.1 k   | 31.9 k-n | -5.9 d-i  | 13.9 l-n |
|                     | C-BIO CPS             | 30.2 i-l         | -8.9 d-f  | 11.1 ij  | 33.0 hi  | -10.5 g-k | 14.1 kl  | 32.4 k-m | 5.6 c-e   | 14.2 l-n |
|                     | Control               | 30.4 i-k         | -9.5 e-g  | 12.4 i   | 33.6 h   | -11.6 g-k | 15.7 k   | 32.9 kl  | -6.2 d-i  | 14.8 k-m |
| Big Jim             | Tribus                | 45.9 c-e         | -16.8 h-k | 33.2 c-f | 49.7 a-d | -16.5 i-k | 35.2 d-g | 46.8 d-f | -17.3 hi  | 35.9 de  |
|                     | Vitazyme              | 46.2 c-e         | -17.3 h-k | 34.6 b-f | 49.9 a-d | -15.9 i-k | 37.0 c-e | 44.5 e-g | -11.2 f-i | 32.4 ef  |
|                     | C-BIO CPS             | 46.9 b-e         | -17.0 h-k | 34.6 b-f | 49.9 a-d | -17.1 jk  | 37.3 c-e | 46.3 d-f | -17.2 i   | 35.8 de  |
|                     | Control               | 49.1 a-d         | -16.9 h-k | 36.2 a-f | 48.8 cd  | -15.5 i-k | 35.5 d-g | 46.8 d-f | -14.8 g-i | 35.5 de  |
| Cayenne<br>Purple   | Tribus                | 35.1 hi          | 1.0 ab    | 10.9 ij  | 31.2 h-j | 4.0 b-f   | 8.2 lm   | 29.2 l-o | 16.0 bc   | 7.6 n-p  |
|                     | Vitazyme              | 28.3 j-l         | 1.4 ab    | 6.6 j-l  | 28.0 h-j | 6.7 b-e   | 6.9 m    | 26.4 o   | 5.3 c-e   | 5.0 p    |
|                     | C-BIO CPS             | 30.4 i-k         | 5.2 a     | 4.3 l    | 29.5 h-j | 12.1 ab   | 4.1 m    | 25.3 o   | 7.8 cd    | 2.1 p    |
|                     | Control               | 32.0 ij          | 4.4 a     | 7.4 i-l  | 29.6 h-j | 9.6 bc    | 6.8 m    | 25.5 o   | 6.4 c-e   | 1.8 p    |
| Chile de<br>Arbol   | Tribus                | 51.3 ab          | -19.1 jk  | 39.1 ab  | 45.7 d-g | 10.5 ab   | 33.8 d-i | 35.0 i-k | 32.1 ab   | 20.6 h-k |
|                     | Vitazyme              | 49.4 a-d         | -19.3 jk  | 38.4 a-d | 46.7 d-f | 11.0 ab   | 34.9 d-g | 34.7 jk  | 31.3 ab   | 20.1 i-l |
|                     | C-BIO CPS             | 50.2 a-c         | -19.0 jk  | 37.7 a-d | 44.9 d-g | 9.1 b-d   | 32.5 e-j | 33.6 kl  | 31.0 ab   | 19.0 j-m |
|                     | Control               | 51.7 ab          | -19.4 k   | 38.7 a-c | 40.8 g   | 23.3 a    | 27.6 h-j | 34.1 kl  | 33.0 a    | 19.6 i-l |
| Jamaica<br>Hot Red  | Tribus                | 53.4 a           | -16.7 h-k | 39.9 ab  | 54.7 a-c | -15.4 h-k | 44.4 a-c | 51.2 a-d | 7.5 cd    | 44.6 ab  |
|                     | Vitazyme              | 53.9 a           | -15.5 h-k | 38.4 a-d | 55.2 ab  | -14.9 h-k | 46.1 a   | 54.6 a   | 0.2 c-g   | 46.2 a   |
|                     | C-BIO CPS             | 53.8 a           | -15.8 h-k | 40.8 a   | 54.8 ab  | -15.3 h-k | 44.6 ab  | 54.0 ab  | 1.2 c-f   | 46.1 a   |
|                     | Control               | 53.7 a           | -13.3 e-h | 40.2 ab  | 56.1 a   | -15.1 h-k | 45.3 ab  | 52.1 a-c | 4.8 c-e   | 43.4 a-c |
| Mulato<br>Isleno    | Tribus                | 49.2 a-d         | -18.2 h-k | 37.3 a-d | 49.7 b-d | -9.7 g-k  | 40.0 a-d | 50.1 a-d | -15.4 g-i | 39.0 b-d |
|                     | Vitazyme              | 50.3 a-c         | -14.3 g-j | 36.7 a-e | 48.5 d   | -2.5 c-h  | 37.6 c-e | 49.5 b-e | -16.4 hi  | 37.9 c-e |
|                     | C-BIO CPS             | 49.7 a-d         | -13.9 f-i | 36.6 a-f | 48.0 de  | -0.3 b-g  | 36.4 de  | 48.2 c-e | -7.1 d-i  | 35.4 de  |
|                     | Control               | 50.5 a-c         | -18.3 h-k | 38.7 a-c | 49.3 b-d | -5.4 e-k  | 38.5 b-e | 52.1 a-c | -14.7 g-i | 41.3 a-d |
| Padron              | Tribus                | 42.4 e-g         | -17.3 h-k | 30.8 e-g | 44.9 d-g | -14.8 h-k | 33.3 d-j | 39.2 h-j | 3.0 c-f   | 26.0 g-i |
|                     | Vitazyme              | 42.3 e-g         | -17.3 h-k | 30.8 fg  | 44.7 d-g | -12.2 g-k | 34.7 d-h | 39.1 h-j | -4.7 d-i  | 26.3 f-h |
|                     | C-BIO CPS             | 45.1 de          | -18.7 i-k | 35.3 a-f | 45.3 d-g | -17.7 k   | 36.0 d-f | 41.2 gh  | -3.4 d-i  | 28.9 fg  |
|                     | Control               | 43.3 ef          | -18.0 h-k | 33.0 d-f | 41.6 fg  | -7.1 f-k  | 31.8 e-j | 39.9 g-i | -4.7 d-i  | 27.4 fg  |
| Pasilla<br>Bajio    | Tribus                | 26.0 kl          | -3.1 bc   | 4.3 l    | 26.6 j   | -3.6 d-i  | 4.5 m    | 27.8 m-o | -3.8 d-i  | 7.1 op   |
|                     | Vitazyme              | 25.8 kl          | -3.1 b    | 4.3 l    | 27.8 h-j | -4.2 e-j  | 5.5 m    | 27.3 no  | -1.0 c-h  | 5.7 p    |
|                     | C-BIO CPS             | 25.2 l           | -3.1 bc   | 4.3 kl   | 26.7 j   | -3.9 d-i  | 5.3 m    | 27.9 m-o | -4.1 d-i  | 7.3 op   |
|                     | Control               | 25.8 kl          | -3.6 b-d  | 4.7 kl   | 27.3 ij  | -4.3 e-j  | 5.7 m    | 27.3 no  | -3.5 d-i  | 5.6 p    |
| P-value             | Cultivar              | <.0001           | <.0001    | <.0001   | <.0001   | <.0001    | <.0001   | <.0001   | <.0001    | <.0001   |
|                     | Biostimulant          | 0.26             | 0.26      | 0.39     | 0.23     | 0.038     | 0.12     | 0.96     | 0.098     | 0.69     |
|                     | Cultivar*Biostimulant | 0.0053           | 0.017     | 0.020    | 0.22     | 0.020     | 0.11     | 0.005    | 0.047     | 0.0024   |

<sup>1</sup> Different lower-case letters suggest significant difference among means within a column indicated by Tukey's HSD test at  $P \leq 0.05$ . <sup>2</sup> Highlighted areas indicate variations of tested variable among biostimulant treatments within a given cultivar.

**Table S3.** Fruit color of chile peppers affected by the interaction between cultivar and biostimulant treatment in 2021.

| Cultivar            | Biostimulant          | L <sup>1,2</sup> | 2021      |          |          |           |          |          |           |          |
|---------------------|-----------------------|------------------|-----------|----------|----------|-----------|----------|----------|-----------|----------|
|                     |                       |                  | July      |          |          | August    |          |          | September |          |
|                     |                       |                  | a*        | b*       | L        | a*        | b*       | L        | a*        | b*       |
| Anaheim<br>Chili    | Tribus                | 39.5 i           | -15.1 f   | 22.5 j   | 40.0 k   | -15.7 d-g | 25.6 mn  | 39.3 g-i | -13.8 f-j | 24.4 h   |
|                     | Vitazyme              | 39.9 hi          | -15.2 fg  | 22.8 ij  | 40.2 jk  | -15.0 d   | 26.1 mn  | 37.7 i   | -5.8 b-i  | 22.0 h   |
|                     | C-BIO CPS             | 40.2 hi          | -15.4 fg  | 23.8 h-j | 40.4 jk  | -15.6 d-f | 25.2 n   | 39.1 hi  | -11.4 d-j | 24.2 h   |
|                     | Control               | 39.8 i           | -15.4 fg  | 23.0 h-j | 41.1 jk  | -16.0 d-h | 26.4 l-n | 38.8 hi  | -6.5 b-i  | 24.4 gh  |
| Ancho or<br>Poblano | Tribus                | 28.2 j-l         | -6.9 e    | 8.1 kl   | 31.1 l-n | -8.7 c    | 10.9 op  | 32.1 j   | -1.0 a-e  | 14.5 i   |
|                     | Vitazyme              | 29.4 j-l         | -7.5 e    | 8.9 k    | 32.7 l   | -10.6 c   | 13.8 o   | 31.3 j-l | -10.3 d-j | 13.6 i   |
|                     | C-BIO CPS             | 29.5 j-l         | -7.4 e    | 8.8 k    | 31.4 lm  | -9.8 c    | 12.2 op  | 31.7 jk  | -2.6 a-f  | 14.8 i   |
|                     | Control               | 28.9 j-l         | -7.3 e    | 8.6 k    | 32.2 lm  | -11.0 c   | 14.6 o   | 32.4 j   | -9.2 c-j  | 13.8 i   |
| Big Jim             | Tribus                | 49.6 c-f         | -18.4 j-l | 36.8 b-e | 48.3 e-g | -16.8 d-i | 35.3 g-k | 47.3 c-f | -14.6 f-j | 35.2 d-f |
|                     | Vitazyme              | 48.4 d-f         | -17.8 i-l | 35.2 c-e | 48.1 e-h | -17.3 d-i | 36.3 g-j | 46.9 c-f | -8.7 c-j  | 34.4 ef  |
|                     | C-BIO CPS             | 46.1 fg          | -17.0 f-k | 32.6 ef  | 45.8 f-i | -16.2 d-i | 32.5 jk  | 44.4 d-f | -16.2 g-j | 31.1 f   |
|                     | Control               | 47.0 e-g         | -17.7 h-l | 34.1 d-f | 47.6 e-i | -16.8 d-i | 34.9 h-k | 48.1 cd  | -17.1 h-j | 35.9 d-f |
| Cayenne<br>Purple   | Tribus                | 30.7 j           | 2.4 a     | 5.8 k-m  | 30.7 l-n | 0.9 a     | 7.9 pq   | 31.0 j-l | 5.5 ab    | 10.5 i-k |
|                     | Vitazyme              | 30.4 jk          | -0.6 bc   | 7.9 kl   | 30.1 l-o | 0.7 a     | 8.6 pq   | 31.8 jk  | -0.4 a-e  | 12.4 ij  |
|                     | C-BIO CPS             | 26.4 l           | 3.5 a     | 1.5 m    | 28.4 m-o | 2.5 a     | 4.8 q    | 26.4 l   | 3.1 a-c   | 4.7 k    |
|                     | Control               | 28.9 j-l         | 1.9 ab    | 4.9 k-m  | 28.9 l-o | 2.6 a     | 5.2 q    | 30.5 j-l | 9.7 a     | 11.0 i-k |
| Chile de<br>Arbol   | Tribus                | 50.6 b-d         | -19.4 l   | 37.6 b-d | 50.1 c-e | -19.2 i   | 39.5 d-h | 47.1 c-f | -9.0 c-j  | 37.4 d-f |
|                     | Vitazyme              | 49.6 c-f         | -19.5 l   | 37.1 b-d | 49.8 d-f | -18.9 hi  | 39.3 e-h | 51.9 bc  | -19.8 j   | 41.2 b-d |
|                     | C-BIO CPS             | 50.5 b-e         | -19.3 kl  | 37.4 b-d | 50.4 c-e | -18.9 hi  | 39.7 c-h | 51.6 bc  | -18.4 ij  | 40.6 c-e |
|                     | Control               | 48.2 d-f         | -19.3 kl  | 35.6 b-e | 49.2 d-g | -18.7 g-i | 38.3 f-i | 46.4 d-f | -6.9 b-i  | 34.9 d-f |
| Jamaica<br>Hot Red  | Tribus                | 50.8 a-d         | -16.9 f-k | 37.7 b-d | 55.8 ab  | -15.2 de  | 44.7 a-c | 56.0 ab  | -7.0 b-i  | 47.7 ab  |
|                     | Vitazyme              | 53.6 ab          | -15.5 f-i | 40.0 ab  | 57.0 a   | -16.1 d-h | 44.9 ab  | 57.0 a   | -5.7 b-h  | 48.7 a   |
|                     | C-BIO CPS             | 54.2 a           | -17.4 f-l | 42.4 a   | 57.0 a   | -16.0 d-h | 47.3 a   | 58.0 a   | -9.0 c-j  | 49.1 a   |
|                     | Control               | 52.8 a-c         | -16.5 f-j | 39.0 a-c | 55.8 ab  | -15.2 de  | 44.3 a-d | 54.8 ab  | 1.3 a-d   | 45.6 a-c |
| Mulato<br>Isleno    | Tribus                | 49.7 c-e         | -19.5 l   | 37.2 b-d | 49.7 d-f | -17.0 d-i | 39.5 d-h | 47.8 cd  | -12.6 e-j | 36.6 d-f |
|                     | Vitazyme              | 49.8 c-e         | -19.7 l   | 38.5 a-d | 52.4 b-d | -18.3 f-i | 43.5 a-e | 47.5 c-e | -3.0 a-f  | 37.0 d-f |
|                     | C-BIO CPS             | 50.4 b-e         | -19.8 l   | 38.6 a-c | 50.6 c-e | -15.9 d-g | 40.1 a-g | 47.8 cd  | -12.4 e-j | 36.6 d-f |
|                     | Control               | 49.9 c-e         | -19.2 kl  | 37.6 b-d | 53.9 a-c | -18.7 g-i | 43.1 a-f | 47.9 cd  | -12.7 e-j | 36.3 d-f |
| Padron              | Tribus                | 41.8 hi          | -17.0 f-k | 27.0 g-i | 43.6 i-k | -17.9 d-i | 31.3 j-l | 42.5 f-i | -11.3 d-k | 30.9 fg  |
|                     | Vitazyme              | 41.6 hi          | -16.7 f-j | 26.8 g-j | 43.7 i-k | -17.2 d-i | 30.6 k-m | 42.8 e-h | -12.0 e-j | 31.9 f   |
|                     | C-BIO CPS             | 43.4 h           | -17.5 g-l | 29.8 fg  | 45.5 g-i | -18.3 f-i | 33.7 i-k | 43.4 d-h | -17.1 h-j | 32.3 f   |
|                     | Control               | 42.0 hi          | -17.0 f-k | 27.3 gh  | 44.0 h-j | -18.2 e-i | 32.3 jk  | 44.2 d-g | -11.0 d-j | 33.8 f   |
| Pasilla<br>Bajio    | Tribus                | 26.3 l           | -2.5 cd   | 3.3 m    | 27.2 no  | -3.7 b    | 4.7 q    | 26.6 l   | -4.1 b-g  | 6.0 jk   |
|                     | Vitazyme              | 26.7 kl          | -2.2 cd   | 2.9 m    | 27.2 no  | -3.2 b    | 4.2 q    | 27.0 kl  | -4.8 b-h  | 6.5 jk   |
|                     | C-BIO CPS             | 26.4 l           | -2.4 cd   | 3.1 m    | 26.6 o   | -3.3 b    | 4.1 q    | 26.9 kl  | -4.5 b-h  | 5.9 jk   |
|                     | Control               | 26.8 kl          | -3.0 d    | 3.8 lm   | 26.2 o   | -3.1 b    | 4.0 q    | 27.6 j-l | -4.3 b-g  | 5.8 k    |
| P-value             | Tribus                | <.0001           | <.0001    | <.0001   | <.0001   | <.0001    | <.0001   | <.0001   | <.0001    | <.0001   |
|                     | Biostimulant          | 0.41             | 0.78      | 0.37     | 0.38     | 0.28      | 0.17     | 0.6576   | 0.015     | 0.42     |
|                     | Cultivar*Biostimulant | <.0001           | <.0001    | <.0001   | 0.023    | 0.04      | 0.0009   | <.0001   | <.0001    | 0.0003   |

<sup>1</sup> Different lower-case letters suggest significant difference among means within a column indicated by Tukey's HSD test at  $P \leq 0.05$ . <sup>2</sup> Highlighted areas indicate variations of tested variable among biostimulant treatments within a given cultivar.

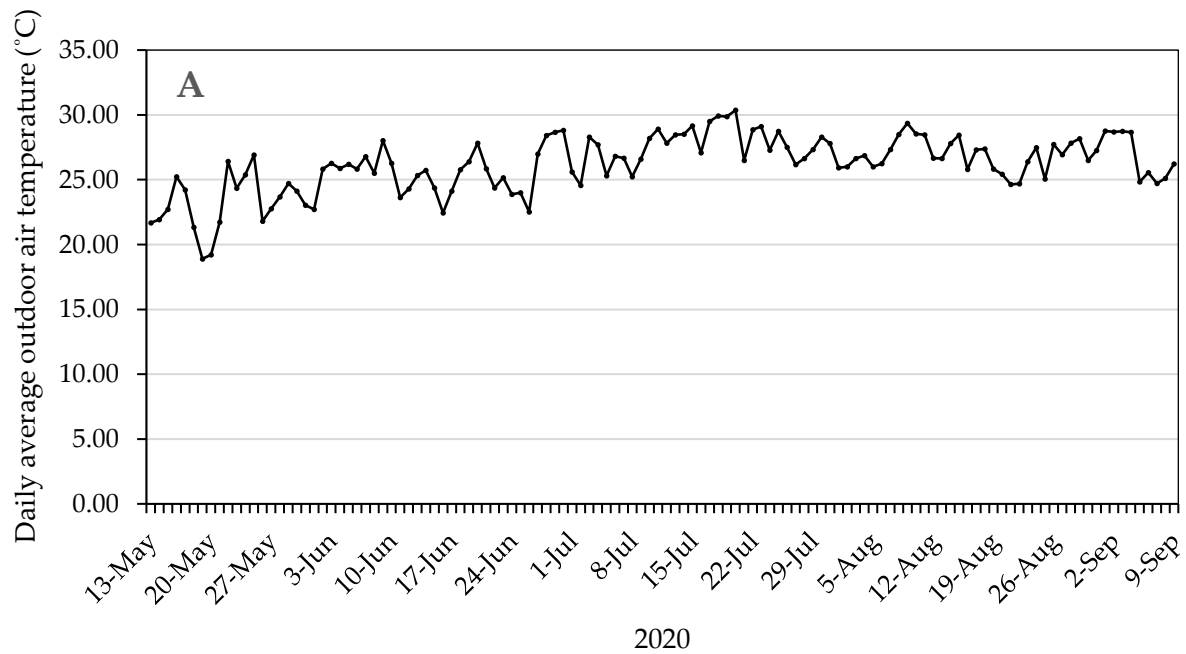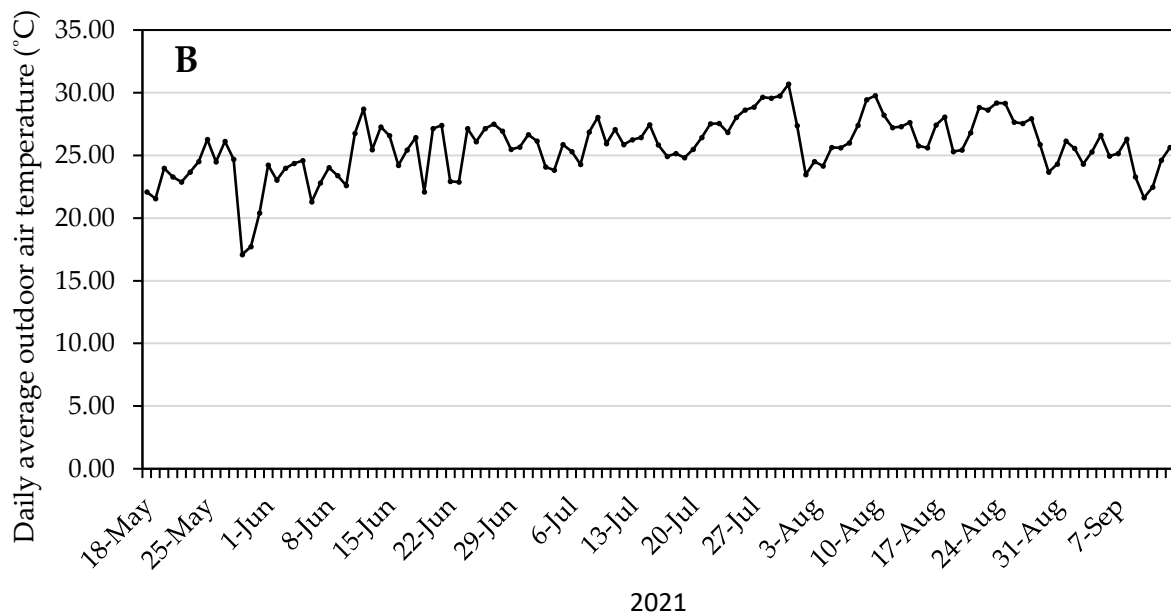

**Figure S1.** Daily average outdoor air temperatures within the experiment duration in 2020 (A) and 2021 (B). Outdoor air temperatures were recorded by a temperature and relative humidity sensor (HOBO S-THB-M002; Onset Computer Corp.) at one-hour intervals connected to a data logger (HOBO Micro Station H21-002; Onset Computer Corp.).
